# Supplementary material for: Encapsulation of a guest sodium cation by iron(iii) tris-(hydroxamate)s
Source: Royal Society of Chemistry journal article supplement (doi:10.1039/c2dt30669g), 2012-01-01
Supplement: c2dt30669g.pdf [file c2dt30669g.pdf]

Electronic Supporting Information

**Encapsulation of a Guest Sodium Cation  
by Iron(III) tris-(Hydroxamate)s**

**Irina A. Golenya,<sup>a</sup> Elzbieta Gumienna-Kontecka,<sup>\*b</sup> Aleksander N. Boyko,<sup>a</sup> Matti Haukka,<sup>c</sup> and Igor O. Fritsky<sup>\*a</sup>**

*Supporting Information*

Table S1. Bond distances (Å) and angles (°) for **1**.

|                                        |             |                                         |            |
|----------------------------------------|-------------|-----------------------------------------|------------|
| Fe1—O1 <sup>i</sup>                    | 1.981 (3)   | O2—C1                                   | 1.294 (6)  |
| Fe1—O1 <sup>ii</sup>                   | 1.981 (3)   | N1—C1                                   | 1.283 (6)  |
| Fe1—O1                                 | 1.981 (3)   | N1—H1                                   | 0.8800     |
| Fe1—O2                                 | 2.048 (3)   | N2—C4                                   | 1.328 (7)  |
| Fe1—O2 <sup>ii</sup>                   | 2.048 (3)   | N2—C5                                   | 1.344 (8)  |
| Fe1—O2 <sup>i</sup>                    | 2.048 (3)   | C1—C2                                   | 1.477 (7)  |
| Fe1—Na1                                | 3.0414 (12) | C2—C6                                   | 1.380 (7)  |
| Na1—O2 <sup>ii</sup>                   | 2.331 (3)   | C2—C3                                   | 1.394 (7)  |
| Na1—O2 <sup>i</sup>                    | 2.331 (3)   | C3—C4                                   | 1.382 (8)  |
| Na1—O2                                 | 2.331 (3)   | C3—H3                                   | 0.9500     |
| Na1—O2 <sup>iii</sup>                  | 2.331 (3)   | C4—H4                                   | 0.9500     |
| Na1—O2 <sup>iv</sup>                   | 2.331 (3)   | C5—C6                                   | 1.391 (8)  |
| Na1—O2 <sup>v</sup>                    | 2.331 (3)   | C5—H5                                   | 0.9500     |
| Na1—Fe1 <sup>v</sup>                   | 3.0414 (12) | C6—H6                                   | 0.9500     |
| O1—N1                                  | 1.396 (6)   |                                         |            |
| O1 <sup>i</sup> —Fe1—O1 <sup>ii</sup>  | 94.03 (14)  | O2—Na1—Fe1                              | 42.30 (8)  |
| O1 <sup>i</sup> —Fe1—O1                | 94.02 (14)  | O2 <sup>iii</sup> —Na1—Fe1              | 137.70 (8) |
| O1 <sup>ii</sup> —Fe1—O1               | 94.02 (14)  | O2 <sup>iv</sup> —Na1—Fe1               | 137.70 (8) |
| O1 <sup>i</sup> —Fe1—O2                | 155.08 (14) | O2 <sup>v</sup> —Na1—Fe1                | 137.70 (8) |
| O1 <sup>ii</sup> —Fe1—O2               | 109.83 (14) | O2 <sup>ii</sup> —Na1—Fe1 <sup>v</sup>  | 137.70 (8) |
| O1—Fe1—O2                              | 77.68 (13)  | O2 <sup>i</sup> —Na1—Fe1 <sup>v</sup>   | 137.70 (8) |
| O1 <sup>i</sup> —Fe1—O2 <sup>ii</sup>  | 109.83 (14) | O2—Na1—Fe1 <sup>v</sup>                 | 137.70 (8) |
| O1 <sup>ii</sup> —Fe1—O2 <sup>ii</sup> | 77.68 (13)  | O2 <sup>iii</sup> —Na1—Fe1 <sup>v</sup> | 42.30 (8)  |
| O1—Fe1—O2 <sup>ii</sup>                | 155.08 (14) | O2 <sup>iv</sup> —Na1—Fe1 <sup>v</sup>  | 42.30 (8)  |
| O2—Fe1—O2 <sup>ii</sup>                | 83.09 (14)  | O2 <sup>v</sup> —Na1—Fe1 <sup>v</sup>   | 42.30 (8)  |
| O1 <sup>i</sup> —Fe1—O2 <sup>i</sup>   | 77.68 (13)  | Fe1—Na1—Fe1 <sup>v</sup>                | 180.0      |
| O1 <sup>ii</sup> —Fe1—O2 <sup>i</sup>  | 155.08 (14) | N1—O1—Fe1                               | 114.5 (3)  |
| O1—Fe1—O2 <sup>i</sup>                 | 109.83 (14) | C1—O2—Fe1                               | 112.6 (3)  |

|                                         |             |            |            |
|-----------------------------------------|-------------|------------|------------|
| O2—Fe1—O2 <sup>i</sup>                  | 83.09 (14)  | C1—O2—Na1  | 146.6 (3)  |
| O2 <sup>ii</sup> —Fe1—O2 <sup>i</sup>   | 83.09 (14)  | Fe1—O2—Na1 | 87.72 (11) |
| O1 <sup>i</sup> —Fe1—Na1                | 122.36 (11) | C1—N1—O1   | 114.0 (4)  |
| O1 <sup>ii</sup> —Fe1—Na1               | 122.36 (11) | C1—N1—H1   | 123.0      |
| O1—Fe1—Na1                              | 122.36 (11) | O1—N1—H1   | 123.0      |
| O2—Fe1—Na1                              | 49.98 (9)   | C4—N2—C5   | 117.1 (5)  |
| O2 <sup>ii</sup> —Fe1—Na1               | 49.98 (9)   | N1—C1—O2   | 121.2 (5)  |
| O2 <sup>i</sup> —Fe1—Na1                | 49.98 (9)   | N1—C1—C2   | 119.9 (4)  |
| O2 <sup>ii</sup> —Na1—O2 <sup>i</sup>   | 71.30 (12)  | O2—C1—C2   | 118.9 (4)  |
| O2 <sup>ii</sup> —Na1—O2                | 71.30 (12)  | C6—C2—C3   | 117.4 (5)  |
| O2 <sup>i</sup> —Na1—O2                 | 71.30 (12)  | C6—C2—C1   | 123.4 (5)  |
| O2 <sup>ii</sup> —Na1—O2 <sup>iii</sup> | 108.70 (12) | C3—C2—C1   | 119.2 (4)  |
| O2 <sup>i</sup> —Na1—O2 <sup>iii</sup>  | 180.0       | C4—C3—C2   | 119.8 (5)  |
| O2—Na1—O2 <sup>iii</sup>                | 108.70 (12) | C4—C3—H3   | 120.1      |
| O2 <sup>ii</sup> —Na1—O2 <sup>iv</sup>  | 180.0       | C2—C3—H3   | 120.1      |
| O2 <sup>i</sup> —Na1—O2 <sup>iv</sup>   | 108.70 (12) | N2—C4—C3   | 123.2 (5)  |
| O2—Na1—O2 <sup>iv</sup>                 | 108.70 (12) | N2—C4—H4   | 118.4      |
| O2 <sup>iii</sup> —Na1—O2 <sup>iv</sup> | 71.29 (12)  | C3—C4—H4   | 118.4      |
| O2 <sup>ii</sup> —Na1—O2 <sup>v</sup>   | 108.70 (12) | N2—C5—C6   | 123.4 (5)  |
| O2 <sup>i</sup> —Na1—O2 <sup>v</sup>    | 108.70 (12) | N2—C5—H5   | 118.3      |
| O2—Na1—O2 <sup>v</sup>                  | 180.0       | C6—C5—H5   | 118.3      |
| O2 <sup>iii</sup> —Na1—O2 <sup>v</sup>  | 71.30 (12)  | C2—C6—C5   | 119.2 (5)  |
| O2 <sup>iv</sup> —Na1—O2 <sup>v</sup>   | 71.30 (12)  | C2—C6—H6   | 120.4      |
| O2 <sup>ii</sup> —Na1—Fe1               | 42.30 (8)   | C5—C6—H6   | 120.4      |
| O2 <sup>i</sup> —Na1—Fe1                | 42.30 (8)   |            |            |

Symmetry codes: (i)  $y, z, x$ ; (ii)  $z, x, y$ ; (iii)  $-y, -z, -x$ ; (iv)  $-z, -x, -y$ ; (v)  $-x, -y, -z$ .

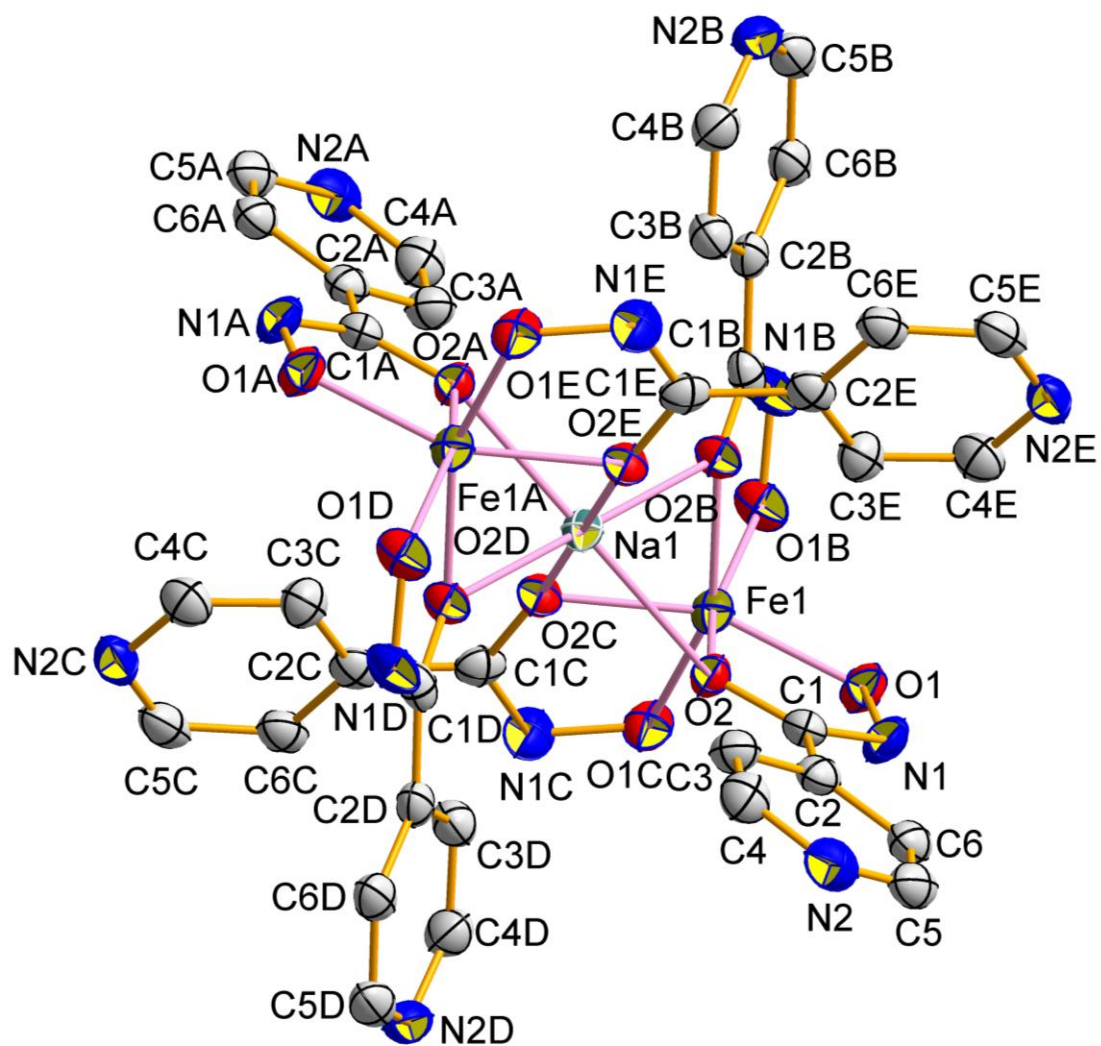

Figure S1. Molecular structure of complex cation in **1** with full numbering scheme. Hydrogen atoms are omitted for clarity. Symmetry codes: (A):  $-x, -y, -z$ ; (B):  $y, z, x$ ; (C):  $z, x, y$ ; (D):  $-y, -z, -x$ ; (E):  $-z, -x, -y$ .

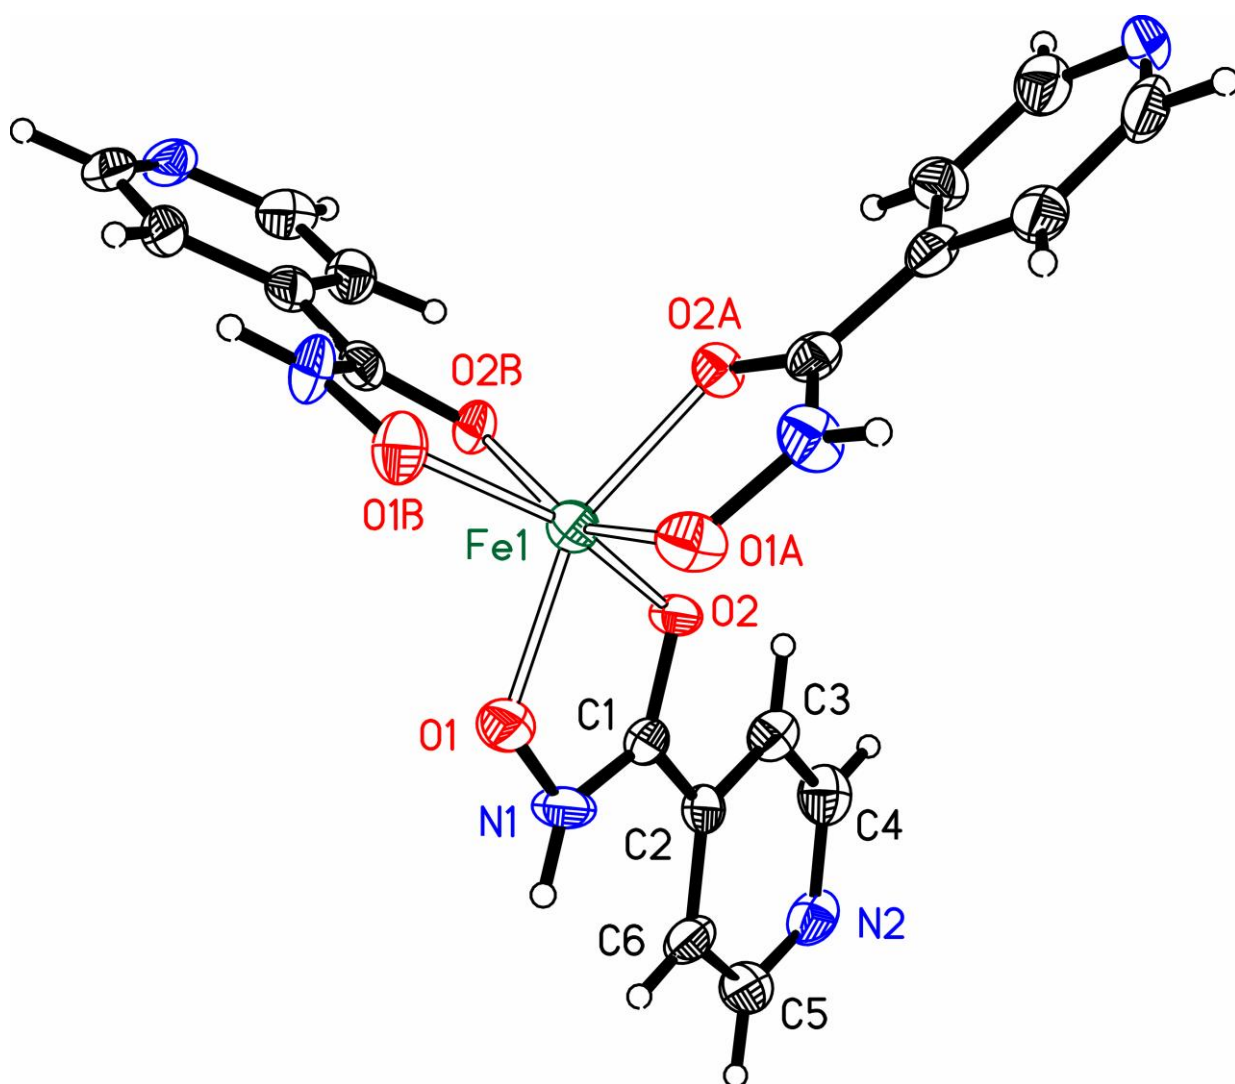

Figure S2. Structure of mononuclear iron(III) tris(hydroxamate) fragment in **1**. Symmetry codes:  
(A):  $z, x, y$ ; (B):  $y, z, x$ .

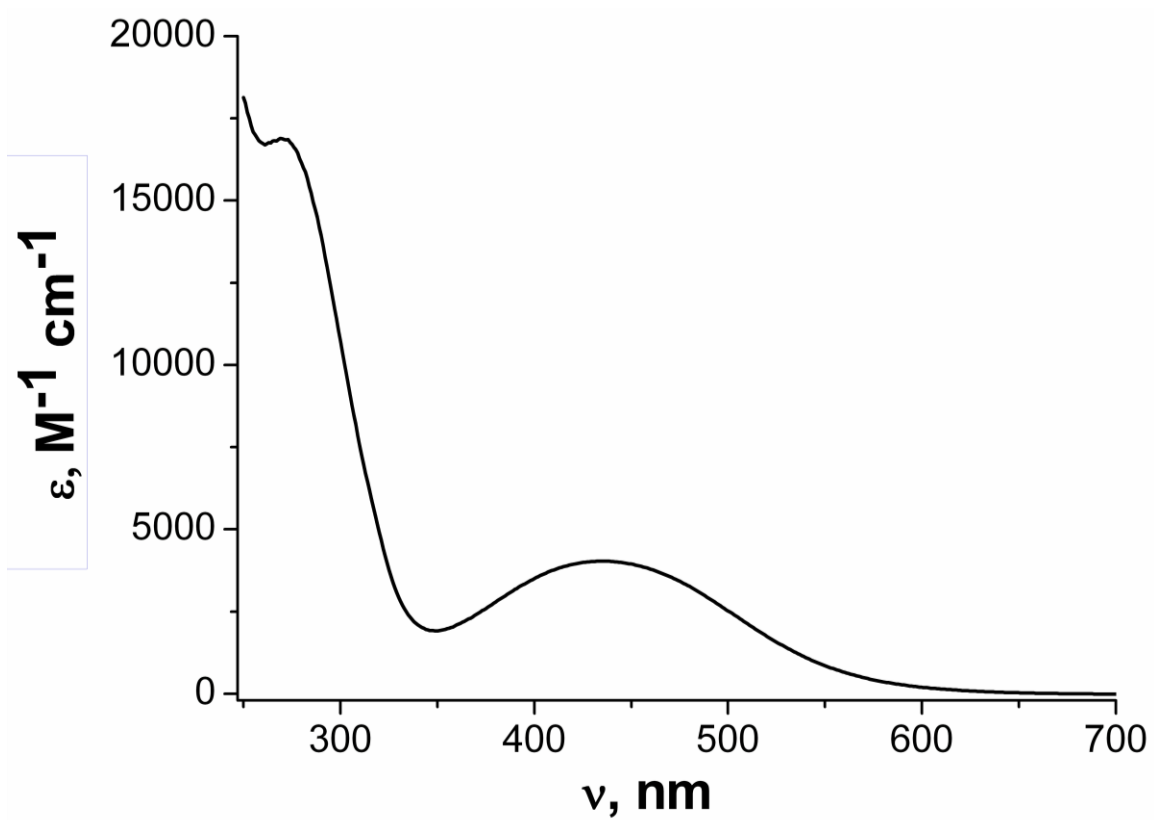

Figure S3. Electronic spectrum of **1** in methanol.

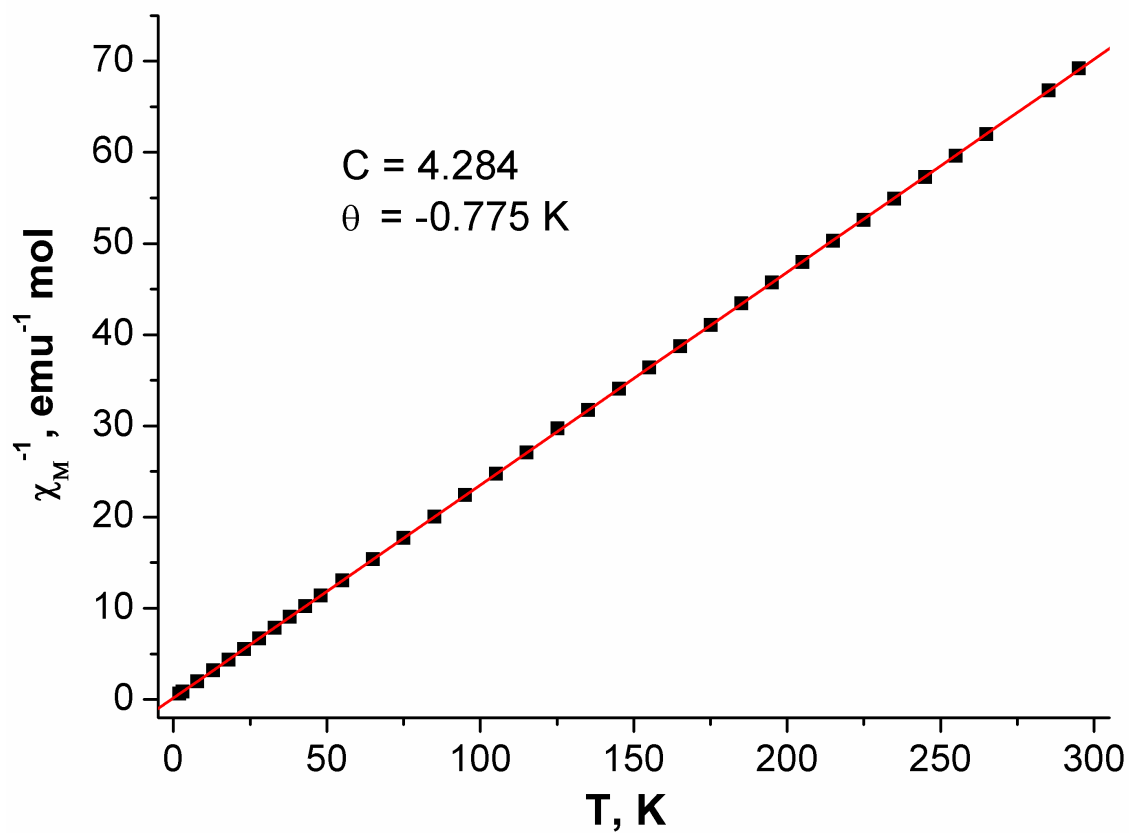

Figure S4. The temperature dependence of the reciprocal molar magnetic susceptibility ( $\chi^{-1}$ ) for **1**. Full red line corresponds to the fit by the Curie-Weiss law.

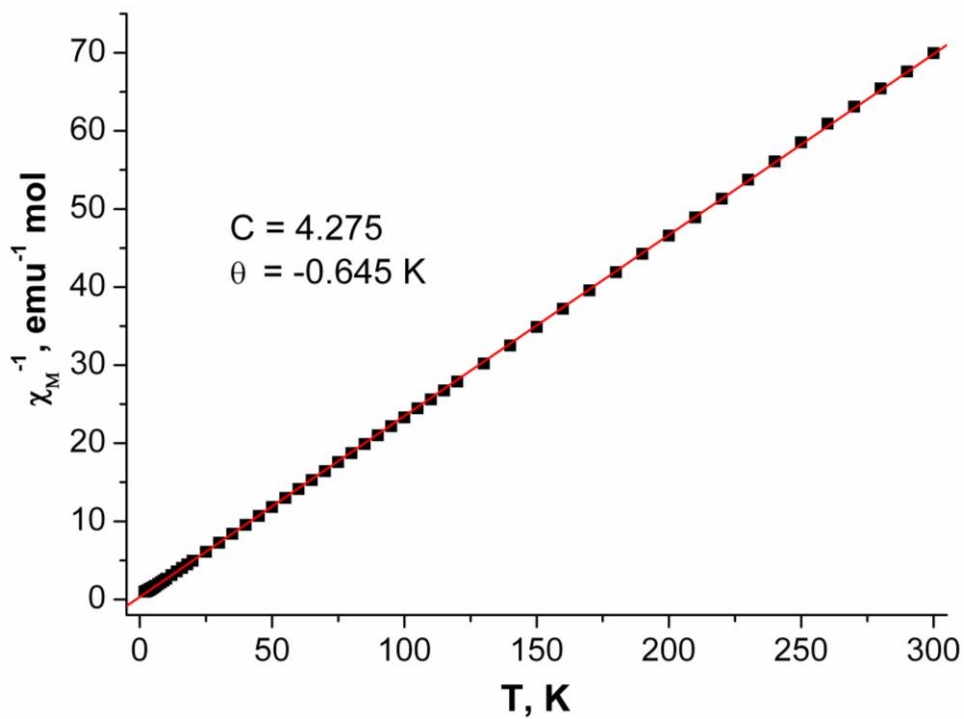

Figure S5. The temperature dependence of the reciprocal molar magnetic susceptibility ( $\chi^{-1}$ ) for  $[\text{Fe}(4\text{-PyMHA})_3] \cdot 5.5\text{H}_2\text{O}$  [4]. Full red line corresponds to the fit by the Curie-Weiss law.
